# Supplementary material
Source: publisher figshare collection journal article supplement (https://frontiersin.figshare.com/ndownloader/files/12418259)
Supplement: Supplementary file [file 12418259]

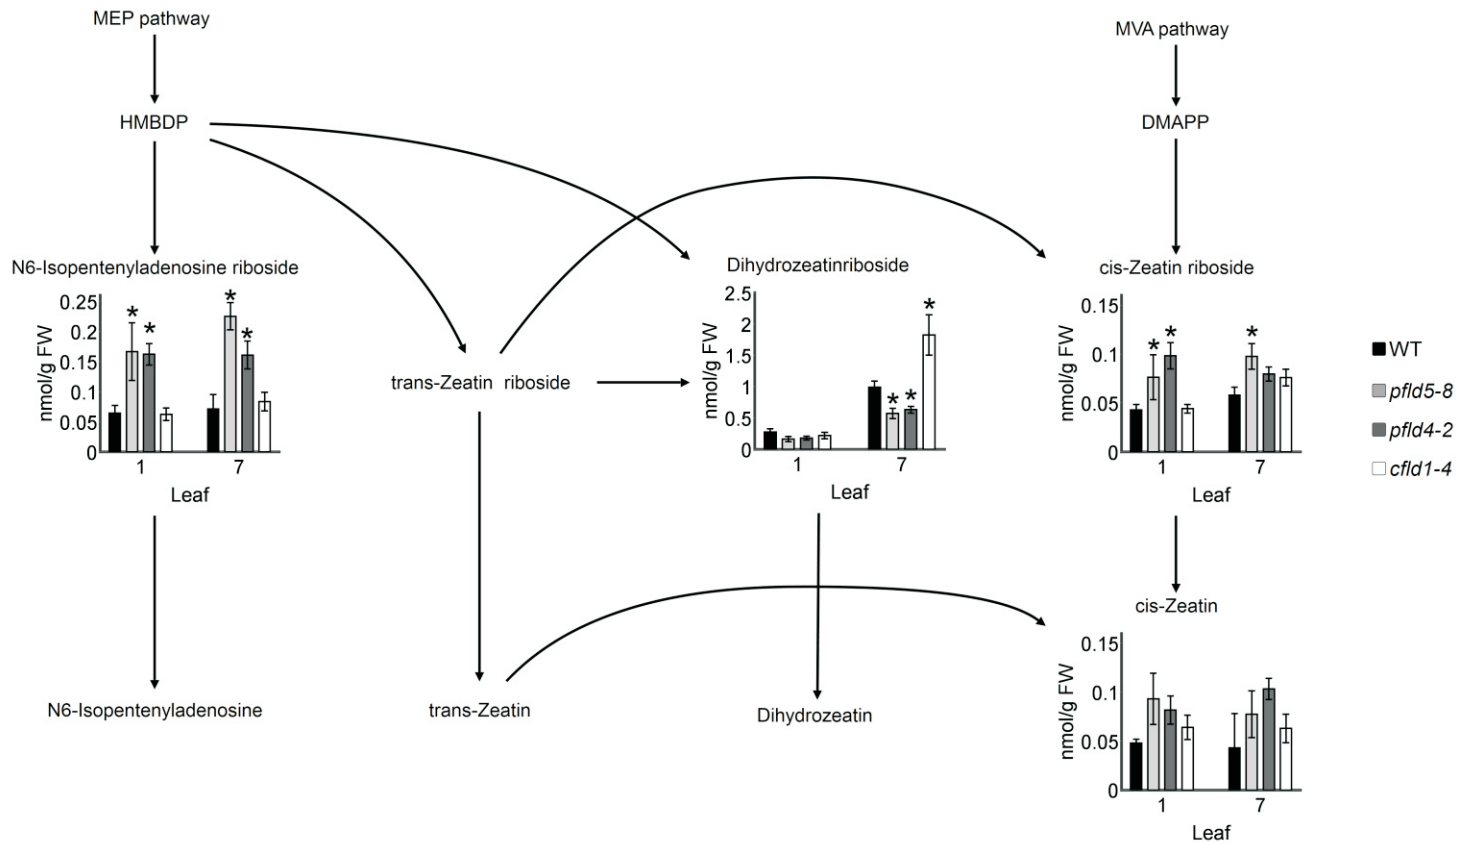

**Supplementary Figure S10.** Plants expressing plastid-targeted Fld contained higher levels of active cytokinins. CKs were measured in leaf tissue from WT, *pfld* and *cfld* plants at 73 dpg. Values shown are means  $\pm$  SE (n = 3-5). Asterisks indicate significant differences with respect to the wild type (ANOVA, P < 0.05). The graph was created using the visualization system VANTED (Junker et al., 2006). MVA, mevalonate; MEP, methylerythritol-4-phosphate; DMAPP, dimethylallyl pyrophosphate; HMBDP, (E)-4-hydroxy-3-methyl-but-2-enyl diphosphate. Units in the ordinates are nmol g<sup>-1</sup> FW.
